# Supplementary material
Source: MDPI journal article supplement (https://www.mdpi.com/1996-1073/8/12/12432)
Supplement: s1 [file s1]

# Supplementary Materials: Integrated Assessment of Carbon Capture and Storage (CCS) in South Africa's Power Sector

Peter Viebahn, Daniel Vallentin and Samuel Höller

For further information, reference is made to project report [1] on which this article is based.

## ad Section 1. Introduction

**Table S1.** List of organizations interviewed in South Africa (face-to-face interviews).

| Organization                                                                    | Date of interview |
|---------------------------------------------------------------------------------|-------------------|
| <i>Industry</i>                                                                 |                   |
| Sasol                                                                           | 24/10/2011        |
| Eskom                                                                           | 27/10/2011        |
| Anglo American                                                                  | 27/10/2011        |
| <i>Civil society</i>                                                            |                   |
| Fossil Fuel Foundation (FFF)                                                    | 25/10/2011        |
| Greenpeace Africa                                                               | 31/10/2011        |
| <i>Science, consultancies and think-tanks</i>                                   |                   |
| South African Centre for Carbon Capture and Storage (SACCCS)                    | 24/10/2011        |
|                                                                                 | 25/10/2011        |
| IMBEWU – Sustainability Legal Specialists                                       | 27/10/2011        |
| Council for Geoscience                                                          | 28/10/2011        |
| School of Chemical and Metallurgical Engineering at University of Witwatersrand | 31/10/2011        |

## Questionnaire (research interviews)

### Your General Position on CCS

1. Please describe your function and how you are involved in the debate on CCS in South Africa.
2. What do you think about carbon capture and storage (CCS) in general and its potential in South Africa?
3. In which way are you and your organization dealing with CCS technologies?

### CCS Stakeholders in South Africa

4. Which stakeholders are most important with regard to the prospects of CCS in South Africa, both within the government and industry?
5. Is there a public opinion on CCS and CO<sub>2</sub> storage in South Africa in particular? Is public acceptance an important determinant for the deployment of CCS?

### CCS in South Africa's Energy Sector

6. Which technological and economic parameters are of decisive meaning for a possible market introduction and diffusion of CO<sub>2</sub> capture technologies in South Africa?
7. What are the most important CO<sub>2</sub> capture activities (demonstration projects, policy initiatives *etc.*) going on in South Africa at the time being?
8. Which technology path is most relevant for South Africa and globally (post-combustion, pre-combustion, oxyfuel)?
9. Is CCS primarily considered for the power sector or also for other industrial CO<sub>2</sub> large-point sources?

10. What share of South Africa's power plant fleet could be equipped with CCS until 2030 or 2050?
11. To which degree do you expect the costs of CCS plants in South Africa to be different from the international level? Why?
12. Does the proximity of South Africa's CO<sub>2</sub> sources or storage sites inhibit or support CCS?
13. Is there a problem regarding increased water needs for CO<sub>2</sub> capture in water scarce regions?

---

#### Energy Scenarios

---

14. What are the most relevant scenario projections (until 2050) for energy and power demand in South Africa?
15. Which of these scenario projections could be used as a basis for a conservative, moderate and ambitious development of CCS in South Africa?
16. How far can CO<sub>2</sub> be transported in South Africa for geological storage in a feasible manner? Is there a maximum value (e.g., 500 km)?

---

#### CO<sub>2</sub> storage

---

17. What are the most important CO<sub>2</sub> storage activities (demonstration projects, policy initiatives *etc.*) going on in South Africa at the time being?
18. Which storage estimates seem to be most realistic for South Africa?
19. Do you know other estimates of or research projects on South Africa's underground storage capacity?
20. Which formations seem most promising in South Africa for CO<sub>2</sub> storage: Coal fields (ECBM), depleted oil or gas fields, deep saline aquifers or basalt formations?
21. Regarding CO<sub>2</sub> sequestration in aquifers: Is a production of water needed to increase the amount of space? If this is the case, what should be done with the produced water to avoid environmental hazard?
22. Do you see a potential conflict of interest between groundwater supply, geothermal energy production and CO<sub>2</sub> storage projects?
23. Could CO<sub>2</sub>-EOR help to boost CCS in South Africa and increase oil production? Are there new EOR operations being planned?
24. Is there a limit to the amount of CO<sub>2</sub> that can be injected safely in the subsurface per year and site (injection rate)?
25. Does seismic activity exclude formations and regions from being potential CO<sub>2</sub> storage sites? Which regions?

---

#### Political Aspects of CCS

---

26. Which political developments are decisive for CCS deployment in South Africa?
27. In which way are South Africa's governments supporting the development and deployment of CCS?
28. Do regulatory frameworks and incentives exist or are they being developed?
29. Would the integration of CCS into the CDM foster CCS development and deployment?

## ad Section 3.2. Long-term usable CO<sub>2</sub> storage potential for South Africa's power sector Energy

### Scenario Analysis

**Table S2.** Overview of existing long-term energy scenarios for South Africa and assessment of their suitability for this study arranged by year of publication.

| Year                                                                                                                                                                 | Scenario                                | Target year | Coal capacity given | CCS for ...                 | Installed CCS capacity            | Cumulative stored CO <sub>2</sub> up to target year  | CCS share of electricity generation | Decision                           | Remark                                                                                                                       |
|----------------------------------------------------------------------------------------------------------------------------------------------------------------------|-----------------------------------------|-------------|---------------------|-----------------------------|-----------------------------------|------------------------------------------------------|-------------------------------------|------------------------------------|------------------------------------------------------------------------------------------------------------------------------|
| World Bank                                                                                                                                                           |                                         |             |                     |                             |                                   |                                                      |                                     |                                    |                                                                                                                              |
| Sources: [2,3] (compiled by Vito [Belgium]; Energetski Institut Hrvoje Požar [Hungary]; Cape Town University's Energy Research Centre [South Africa]) <sup>*1)</sup> |                                         |             |                     |                             |                                   |                                                      |                                     |                                    |                                                                                                                              |
| 2011                                                                                                                                                                 | Reference                               | 2030        | Yes                 | ---                         | ---                               | ---                                                  | ---                                 | n.c.                               |                                                                                                                              |
|                                                                                                                                                                      | Baseline (IRP revised balance scenario) | 2030        | Yes                 | Natural gas (2025)          | Figures for 2020/25/30 0.2–2.4 GW | 19 Mt <sup>*1)</sup>                                 | 2%                                  | n.c.                               |                                                                                                                              |
|                                                                                                                                                                      | Baseline with EOR/ECBM                  | 2030        | Yes                 | Natural gas                 | Only figure for 2030: 2.4 GW      | 23 Mt <sup>*1)</sup> + 4 Mt retrofit                 | 2%                                  | n.c.                               |                                                                                                                              |
|                                                                                                                                                                      | CO <sub>2</sub> Price Scenarios         | 2030        | Yes                 | Coal: 2025 or (mainly) 2030 | Figures for 2025/30 5.9–7.3 GW    | 162/177/283 Mt <sup>*1)</sup> + 15.4/0/0 Mt retrofit | 10–16%                              | n.c.                               |                                                                                                                              |
| EREC and Greenpeace International                                                                                                                                    |                                         |             |                     |                             |                                   |                                                      |                                     |                                    |                                                                                                                              |
| Sources: [4] (compiled by German Aerospace Center and ecofys [the Netherlands])                                                                                      |                                         |             |                     |                             |                                   |                                                      |                                     |                                    |                                                                                                                              |
| 2011                                                                                                                                                                 | Reference                               | 2050        | Yes                 | ---                         | ---                               | ---                                                  | ---                                 | <b>Taken as pathway E2: middle</b> | Up to 2030 based on [5] and updated with figures from IRP (May 2011) (committed and newly built options); updated up to 2050 |
|                                                                                                                                                                      | Energy [R]evolution                     | 2050        | Yes                 | ---                         | ---                               | ---                                                  | ---                                 | <b>Taken as pathway E3: low</b>    | Up to 2030 based on IRP (May 2011) (committed power plants only); updated up to 2050                                         |

Table S2. *Cont.*

| Year                                                                                                     | Scenario                                        | Target year | Coal capacity given | CCS for ... | Installed CCS capacity | Cumulative stored CO <sub>2</sub> up to target year | CCS share of electricity generation | Decision                         | Remark                                       |
|----------------------------------------------------------------------------------------------------------|-------------------------------------------------|-------------|---------------------|-------------|------------------------|-----------------------------------------------------|-------------------------------------|----------------------------------|----------------------------------------------|
| WWF South Africa                                                                                         |                                                 |             |                     |             |                        |                                                     |                                     |                                  |                                              |
| Source: [6] (compiled by Cape Town University's Energy Research Centre [South Africa])                   |                                                 |             |                     |             |                        |                                                     |                                     |                                  |                                              |
| 2010                                                                                                     | Reference Case                                  | 2030        | Yes                 | ---         | ---                    | ---                                                 | ---                                 | n.c.                             | Uses LTMS framework                          |
|                                                                                                          | Alternative Scenario                            | 2030        | Yes                 | ---         | ---                    | ---                                                 | ---                                 | n.c.                             | Uses LTMS framework                          |
| Department of Environment Affairs and Tourism South Africa                                               |                                                 |             |                     |             |                        |                                                     |                                     |                                  |                                              |
| Sources: [7,8] (compiled by Cape Town University's Energy Research Centre [South Africa]) <sup>*2)</sup> |                                                 |             |                     |             |                        |                                                     |                                     |                                  |                                              |
| 2007                                                                                                     | LTMS Scenario 1<br>"Growth without constraints" | 2050        | Yes                 | ---         | ---                    | ---                                                 | ---                                 | <b>Taken as pathway E1: high</b> | 5 new CTL plants each 80,000 bbl/d=½ Secunda |
|                                                                                                          | LTMS Scenario 2<br>"Required by Science"        | 2050        |                     |             |                        |                                                     |                                     |                                  | <i>Storylines</i>                            |
|                                                                                                          | "Start now"                                     | ???         | ---                 | Synfuels    | <i>No figures</i>      | 2 Mt/a                                              | ---                                 | n.c.                             | <sup>*3)</sup>                               |
|                                                                                                          | "Scale up"                                      | ???         | ---                 | Synfuels    | <i>No figures</i>      | 23 Mt/a or 20 Mt/a                                  | ---                                 | n.c.                             | <sup>*2), *3)</sup>                          |
|                                                                                                          | "Use market"                                    |             | ---                 | ---         | ---                    | ---                                                 | ---                                 | n.c.                             |                                              |
|                                                                                                          | "Reach goal"                                    |             | ---                 | ---         | ---                    | ---                                                 | ---                                 | n.c.                             |                                              |

Figures in italics: exclusion criteria; n.c. = not considered. <sup>\*1)</sup> Whole of the Southern Africa Region; <sup>\*2)</sup> Starting figure for 2010 is too low (32.8 GW instead of currently installed 38 GW); IRP figures not given at that time; <sup>\*3)</sup> The low CCS application seems to be a contradiction to the statement that CCS is "included as a major component of energy security strategy" (p. 29).

Main conclusions drawn from the assessment of existing energy scenarios and roadmaps (Table S2):

- No scenarios exist that go up to 2050 and that include use of CCS for power plants;
- Only one scenario applies CCS for coal-to-liquid plants (20 or 23 Mt CO<sub>2</sub>/a), but considers the existing Secunda plant only;
- Two scenarios attempt to achieve climate goals in 2030 and 2050 without using CCS or nuclear energy [4,6], respectively);

Only one study is up-to-date compared with the current power plant development plan of the South African government. [4] adapted both the *Energy [R]evolution Scenario* and the *IEA WEO 2010 scenario*, which is taken as the *Reference Scenario*, to the May 2011 *Policy Adjusted Scenario* of the Integrated Resource Plan (IRP) for Electricity [9]. Since IRP only covers the period up to 2030, the figures were updated to 2050.

### CCS Deployment

**Table S3.** Conventional and CCS-based coal-fired power plant capacity installed in South Africa in the three pathways *E1–E3* for the base case (CCS from 2030).

| Type of capacity                               | 2010      | 2020      | 2030      | 2040      | 2050       |
|------------------------------------------------|-----------|-----------|-----------|-----------|------------|
| <b>E1: high</b>                                |           |           |           |           |            |
| Currently installed                            | 37        | 42        | 28        | 10        | 5          |
| Newly built without CCS                        |           |           | 23        | 16        | 16         |
| Newly built with CCS                           |           |           |           | 34        | 58         |
| Retrofitted with CCS                           |           |           | 4         | 12        | 12         |
| CCS penalty load newly built                   |           |           |           | 6         | 139        |
| CCS penalty load retrofitted                   |           |           | 1         | 2         | 2          |
| Total CCS newly built + penalty                |           |           |           | 40        | 67         |
| Total CCS retrofitted + penalty                |           |           | 5         | 14        | 14         |
| Total CCS                                      |           |           | 5         | 54        | 81         |
| <b>Total</b>                                   | <b>37</b> | <b>42</b> | <b>56</b> | <b>80</b> | <b>102</b> |
| <b>E2: middle</b>                              |           |           |           |           |            |
| Currently installed                            | 37        | 42        | 28        | 10        | 5          |
| Newly built without CCS                        |           | 7         | 12        | 10        | 10         |
| Newly built with CCS                           |           |           |           | 19        | 24         |
| Retrofitted with CCS                           |           |           | 4         | 6         | 6          |
| CCS penalty load newly built                   |           |           |           | 3         | 4          |
| CCS penalty load retrofitted                   |           |           | 1         | 1         | 1          |
| Total CCS newly built + penalty                |           |           |           | 22        | 28         |
| Total CCS retrofitted + penalty                |           |           | 5         | 7         | 7          |
| Total CCS                                      |           |           | 5         | 29        | 35         |
| <b>Total</b>                                   | <b>37</b> | <b>49</b> | <b>45</b> | <b>49</b> | <b>50</b>  |
| <b>E3: low</b>                                 |           |           |           |           |            |
| Currently installed                            | 37        | 42        | 28        | 10        | 5          |
| Newly built without CCS                        |           |           |           |           |            |
| Newly built with CCS                           |           |           |           | 8         | 8          |
| Retrofitted with CCS                           |           |           | 4         | 4         | 4          |
| CCS penalty load newly built                   |           |           |           | 2         | 2          |
| CCS penalty load retrofitted                   |           |           | 1         | 1         | 0          |
| Total CCS newly built + penalty                |           |           |           | 10        | 10         |
| Total CCS retrofitted + penalty                |           |           | 5         | 5         | 5          |
| Total CCS                                      |           |           | 5         | 15        | 15         |
| <b>Total</b>                                   | <b>37</b> | <b>42</b> | <b>33</b> | <b>24</b> | <b>20</b>  |
| All quantities are given in Gt CO <sub>2</sub> |           |           |           |           |            |

## Power Plant Analysis

**Table S4.** Overview of parameters assumed for future coal-fired power plants in South Africa.

|                                                                     | Unit                                           | 2010  | 2020                                                                      | 2030  | 2040 | 2050 |
|---------------------------------------------------------------------|------------------------------------------------|-------|---------------------------------------------------------------------------|-------|------|------|
| <b>Share of power plants in newly built coal fired power plants</b> |                                                |       |                                                                           |       |      |      |
| Supercritical                                                       | %                                              |       | 100                                                                       | 90    | 70   | 60   |
| Integrated Gasification Combined Cycle                              | %                                              |       | 0                                                                         | 10    | 30   | 40   |
| <b>Efficiencies for newly built coal-fired power plants</b>         |                                                |       |                                                                           |       |      |      |
| Supercritical                                                       | %                                              | 38    | 39                                                                        | 41.5  | 42   | 42   |
| Integrated Gasification Combined Cycle                              | %                                              |       | 44                                                                        | 46.5  | 47   | 47   |
| <b>Efficiency losses through CCS</b>                                |                                                |       |                                                                           |       |      |      |
| Efficiency penalty post-combustion                                  | %-pt                                           | 12    | 8.5                                                                       | 7     | 6    | 5    |
| Efficiency penalty pre-combustion                                   | %-pt                                           | 8     | 6.5                                                                       | 6     | 6    | 6    |
| Additional efficiency penalty for retrofiting                       | %-pt                                           | 1.5   | 1.5                                                                       | 1.5   | 1.5  | 1.5  |
| <b>Other parameters</b>                                             |                                                |       |                                                                           |       |      |      |
| Origin of hard coal: import share                                   | %                                              | 0     |                                                                           |       |      |      |
| Net calorific value for medium-quality South African coal           | MJ/kg <sub>coal</sub>                          | 19.6  |                                                                           |       |      |      |
| Price of hard coal mix (100% domestic)                              | \$ <sub>2011</sub> /kwh                        | 1.33  | 1.73                                                                      | 2.20  | 2.67 | 3.15 |
| Technical lifetime of newly built coal-fired plants                 | a                                              |       |                                                                           | 50    |      |      |
| Plant load factor (PLF)                                             | %                                              |       |                                                                           | 80    |      |      |
|                                                                     | h/a                                            |       |                                                                           | 7,000 |      |      |
| CO <sub>2</sub> capture rate                                        | %                                              |       |                                                                           | 90    |      |      |
| Average/maximum CO <sub>2</sub> transport distance                  | km                                             |       |                                                                           | 550   |      |      |
| CO <sub>2</sub> leakage of storage sites                            | %/a                                            |       |                                                                           | 0     |      |      |
| <b>Cost parameter</b>                                               |                                                |       |                                                                           |       |      |      |
| <b>Coal-fired power plants without CCS</b>                          |                                                |       |                                                                           |       |      |      |
| Capital cost                                                        | \$ <sub>2011</sub> /kW <sub>el</sub>           | 2,297 | Further development depends on installed capacities within pathways E1–E3 |       |      |      |
| O&M cost (4% of capital cost)                                       | \$ <sub>2011</sub> /kW <sub>el</sub>           | 92    |                                                                           |       |      |      |
| Learning rate capital cost                                          | %                                              |       |                                                                           | 1.7   |      |      |
| Learning rate O&M cost                                              | %                                              |       |                                                                           | 3.9   |      |      |
| Interest rate                                                       | %                                              |       |                                                                           | 8     |      |      |
| Depreciation period                                                 | a                                              |       |                                                                           | 25    |      |      |
| Resulting annuity factor                                            | %/a                                            |       |                                                                           | 9.37  |      |      |
| <b>Coal-fired power plants with CCS</b>                             |                                                |       |                                                                           |       |      |      |
| Capital cost (175% of capital cost w/o CCS)                         | \$ <sub>2011</sub> /kW <sub>el</sub>           |       | Development from 2030 depends on installed capacities in pathways E1–E3   |       |      |      |
| O&M cost (183% of O&M cost w/o CCS)                                 | \$ <sub>2011</sub> /kW <sub>el</sub>           |       |                                                                           |       |      |      |
| Learning rate capital cost                                          | %                                              |       |                                                                           | 2.5   |      |      |
| Learning rate O&M cost                                              | %                                              |       |                                                                           | 5.8   |      |      |
| CO <sub>2</sub> transportation costs via pipeline                   | \$ <sub>2011</sub> /(tCO <sub>2</sub> ,100 km) |       |                                                                           | 5.5   |      |      |
| Average/maximum CO <sub>2</sub> transport distance                  | km                                             |       |                                                                           | 550   |      |      |
| <b>Other parameters</b>                                             |                                                |       |                                                                           |       |      |      |
| CO <sub>2</sub> costs                                               | \$ <sub>2011</sub> /tCO <sub>2</sub>           |       | 42                                                                        | 49    | 56   | 63   |

## Source-Sink Matching

**Table S5** shows the comparison of the *high storage scenario*  $S_{1600km}$  with coal development pathways *E1–E3*. First, the onshore Zululand basin is filled with 0.4 Gt of CO<sub>2</sub> in each scenario. The offshore Durban & Zululand basin is then filled until all emissions have been stored. The matched capacity amounts to 22.0, 9.3 and 4.0 Gt of CO<sub>2</sub> for pathways *E1*, *E2* and *E3*, respectively.

**Table S5.** Source-sink match of effective storage scenario  $S1_{600km}$ : *high* with coal development pathways  $E1$ – $E3$  in South Africa (authors' calculation with data from [10]).

| Basin                                          | Formation      | $S1_{600km}$ : high | E1: high<br>(22.0) | E2: middle<br>(9.3) | E3: low<br>(4.0) |
|------------------------------------------------|----------------|---------------------|--------------------|---------------------|------------------|
| Zululand                                       | Onshore basin  | 0.4                 | 0.4                | 0.4                 | 0.4              |
| Durban & Zululand                              | Offshore basin | 42.3                | 21.6               | 8.9                 | 3.6              |
| Total                                          |                | 42.7                | 22.0               | 9.3                 | 4.0              |
| All quantities are given in Gt CO <sub>2</sub> |                |                     |                    |                     |                  |

Matching the *intermediate storage scenario*  $S2_{600km}$  with the identified emissions, a similar picture can be seen for the combination with  $E2$  and  $E3$  (Table S6) as for  $S1_{600km}$ . All captured emissions in these two pathways (9.3 and 4.0 Gt of CO<sub>2</sub>) can be stored. Regarding pathway  $E1$ , the available storage capacity is insufficient for storing the entire amount of captured emissions. Hence 17.1 Gt of CO<sub>2</sub> is the matched capacity for  $E1$ .

**Table S6.** Source-sink match of effective storage scenario  $S2_{600km}$ : *intermediate* with coal development pathways  $E1$ – $E3$  in South Africa (authors' calculation with data from [10]).

| Basin                                          | Formation      | $S2_{600km}$ : intermediate | E1: high<br>(22.0) | E2: middle<br>(9.3) | E3: low<br>(4.0) |
|------------------------------------------------|----------------|-----------------------------|--------------------|---------------------|------------------|
| Zululand                                       | Onshore basin  | 0.2                         | 0.2                | 0.2                 | 0.2              |
| Durban & Zululand                              | Offshore basin | 16.9                        | 16.9               | 9.2                 | 3.9              |
| Total                                          |                | 17.1                        | 17.1               | 9.3                 | 4.0              |
| All quantities are given in Gt CO <sub>2</sub> |                |                             |                    |                     |                  |

In contrast to  $S1_{600km}$  and  $S2_{600km}$ , low storage scenario  $S3_{600km}$  does not include onshore capacity; hence only 4.2 Gt of CO<sub>2</sub> is available in the offshore Durban & Zululand basin (Table S7). The total estimated emissions captured therefore exceed the storage space available for  $E1$  and  $E2$ . Thus the matched capacity for  $S3_{600km}$  equals the total storage capacity of 4.2 Gt of CO<sub>2</sub> in these two cases. For  $E3$ , it was possible to store the entire quantity of emissions of 4.0 Gt of CO<sub>2</sub>.

**Table S7.** Source-sink match of effective storage scenario  $S3_{600km}$ : *low* with coal development pathways  $E1$ – $E3$  in South Africa (authors' calculation with data from [10]).

| Basin                                          | Formation      | $S3_{600km}$ : low | E1: high<br>(22.0) | E2: middle<br>(9.3) | E3: low<br>(4.0) |
|------------------------------------------------|----------------|--------------------|--------------------|---------------------|------------------|
| Zululand                                       | Onshore basin  | 0.0                | 0.0                | 0.0                 | 0.0              |
| Durban & Zululand                              | Offshore basin | 4.2                | 4.2                | 4.2                 | 4.0              |
| Total                                          |                | 4.2                | 4.2                | 4.2                 | 4.0              |
| All quantities are given in Gt CO <sub>2</sub> |                |                    |                    |                     |                  |

**ad Section 3.4. Environmental impacts of CCS-based power plants from a life cycle assessment perspective**

**Table S8.** Parameters used in the LCA of future coal-fired power plants in South Africa.

| Parameter                                                                        | Unit                                    | PC power plant | IGCC power plant |
|----------------------------------------------------------------------------------|-----------------------------------------|----------------|------------------|
| <b>Coal-fired power plants without CCS</b>                                       |                                         |                |                  |
| Installed capacity                                                               | MW <sub>el</sub>                        | 600            | 451              |
| Net efficiency                                                                   | %                                       | 41.5           | 46.5             |
| Plant load factor (PLF)                                                          | %                                       | 85             |                  |
|                                                                                  | h/a                                     | 7,500          |                  |
| Plant lifetime                                                                   | a                                       | 25             |                  |
| Type of cooling                                                                  |                                         | Dry            |                  |
| Net calorific value of coal                                                      | MJ <sub>th</sub> /kg <sub>coal</sub>    | 19.59          |                  |
| Methane emissions from coal mining                                               | kg CH <sub>4</sub> /kg <sub>coal</sub>  | 0.0012         |                  |
| CO <sub>2</sub> emissions from coal                                              | kg/MJ <sub>th</sub>                     | 0.0962         |                  |
| <b>CO<sub>2</sub> capture</b>                                                    |                                         |                |                  |
| Type of capture process                                                          |                                         | Post-comb.     | Pre-comb.        |
| Concentration of solvent                                                         | kg/t of CO <sub>2</sub>                 | 1.958          | 0.011            |
| Energy required for capture                                                      | kWh <sub>el</sub> /t of CO <sub>2</sub> | 178            | 119              |
| Energy required for compression                                                  | kWh <sub>el</sub> /t of CO <sub>2</sub> | 92.84          |                  |
| CO <sub>2</sub> capture rate                                                     | %                                       | 90             |                  |
| <b>CO<sub>2</sub> transportation and storage</b>                                 |                                         |                |                  |
| Average CO <sub>2</sub> transport distance                                       | km                                      | 550            |                  |
| Energy required for recompressor                                                 | kWh/tkm                                 | 0.011          |                  |
| Energy required for CO <sub>2</sub> injection into 800 metre deep saline aquifer | kWh/kg CO <sub>2</sub>                  | 0.00668        |                  |

**References**

1. Viebahn, P.; Esken, A.; Höller, S.; Vallentin, D. *CCS Global—Prospects of Carbon Capture and Storage Technologies (CCS) in Emerging Economies*; Wuppertal Inst. for Climate, Environment and Energy: Wuppertal, Germany, 2012; p. 550.
2. Kulichenko, N.; Ereira, E. *Carbon Capture and Storage in Developing Countries: A Perspective on Barriers to Deployment*. *Energy and Mining Sector Board Discussion Paper; Report 25*; The World Bank: Washington, DC, USA, 2011.
3. Tot, M.; Pesut, D.; Hedges, A.; Fedorski, C.; Merven, B.; Trikam, A.; Duerinck, J.; Ferket, H.; Lust, A. *Techno-Economic Assessment of Carbon Capture and Storage Deployment in Power Stations in the Southern African and Balkan Regions*; vito, Energelski institut Hrvoje Pozar, University of Cape Town: Mol, Belgium, 2011.
4. EREC; Greenpeace. *Advanced Energy [R]evolution: A Sustainable Energy Outlook for South Africa*; European Renewable Energy Council, Greenpeace International: Amsterdam, The Netherlands, 2011; p 108.
5. International Energy Agency (IEA). *World Energy Outlook 2008*; IEA: Paris, France, 2008.
6. World Wide Fund for Nature (WWF). *50% by 2030. Renewable Energy in a Just Transition to Sustainable Electricity Supply*; WWF South Africa: Rosebank, South Africa, 2010.
7. Scenario Building Team. *Long-Term Mitigation Scenarios: Strategic Options for South Africa*; Department of Environment Affairs and Tourism South Africa: Pretoria, South Africa, 2007.
8. Energy Research Centre. *Long-Term Mitigation Scenarios: Technical Appendix*; Department of Environment Affairs and Tourism: Pretoria, South Africa, 2007.
9. Ministry of Energy (DOE). *Electricity Regulation Act No. 4 of 2006: Electricity Regulations on the Integrated Resource Plan 2010-2030*; Ministry of Energy, Government of South Africa: Pretoria, South Africa, 2011.
10. Viljoen, J. H. A.; Stapelberg, F. D. J.; Cloete, M. *Technical Report on the Geological Storage of Carbon Dioxide in South Africa*; Council for Geoscience South Africa: Pretoria, South Africa, 2010.
